# Supplementary material
Source: Springer Nature journal article supplement (https://www.springermedizin.de/resource/supplementary/12889_2010_3088_MOESM1_ESM.pdf/9488140)

a

Coal gas suicides E+W 1919-1935  
(males)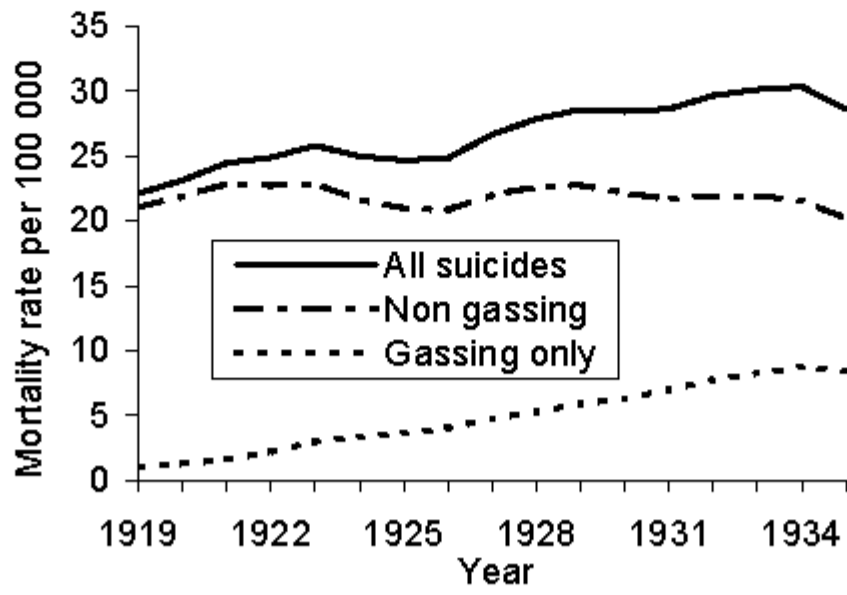

d

Coal gas suicides E+W 1919-1935  
(females)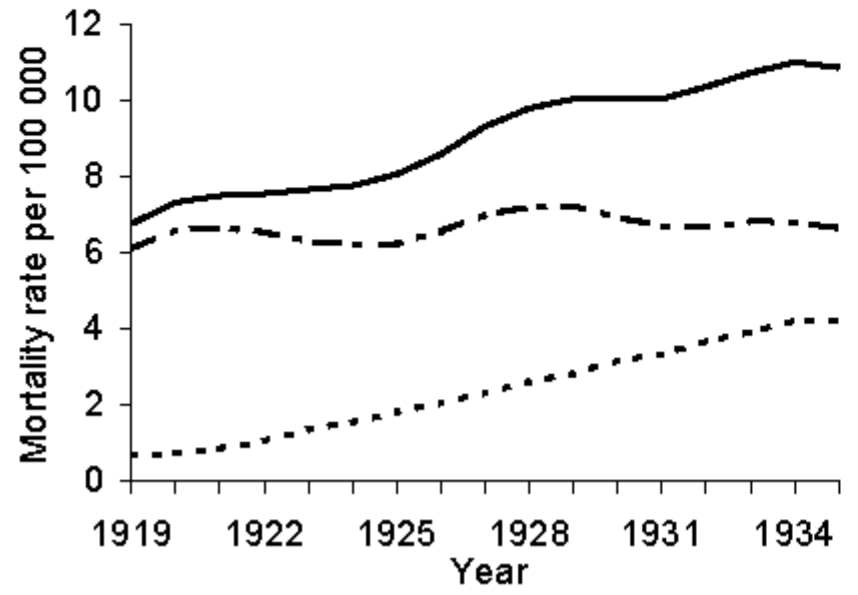

b

Car exhaust suicides E+W 1975-1992  
(males)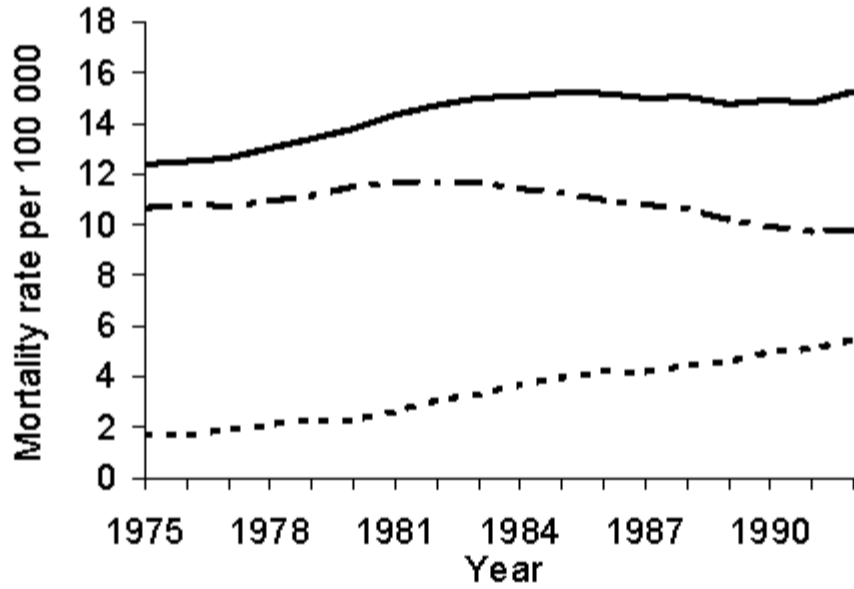

e

Car exhaust suicides E+W 1975-1992  
(females)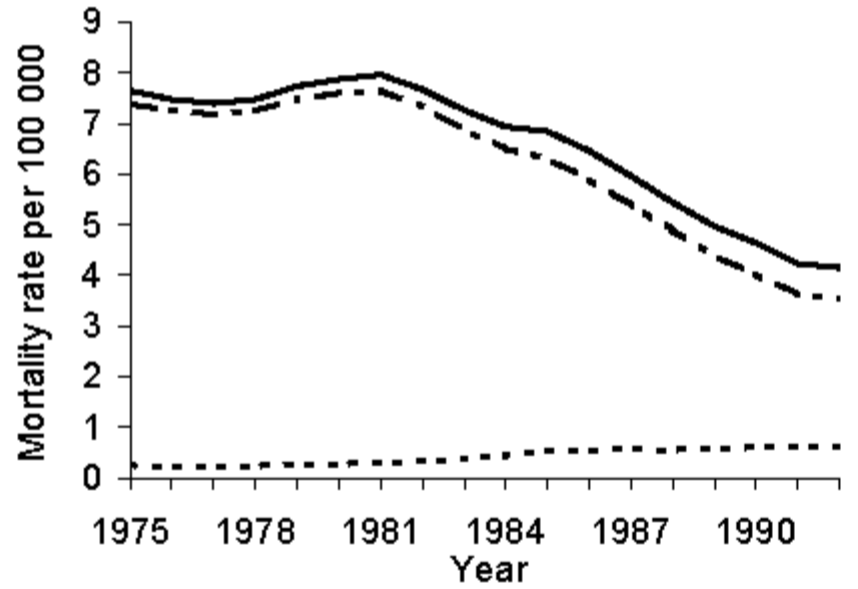

c

Barbecue charcoal suicides Taiwan  
1999-2006 (males)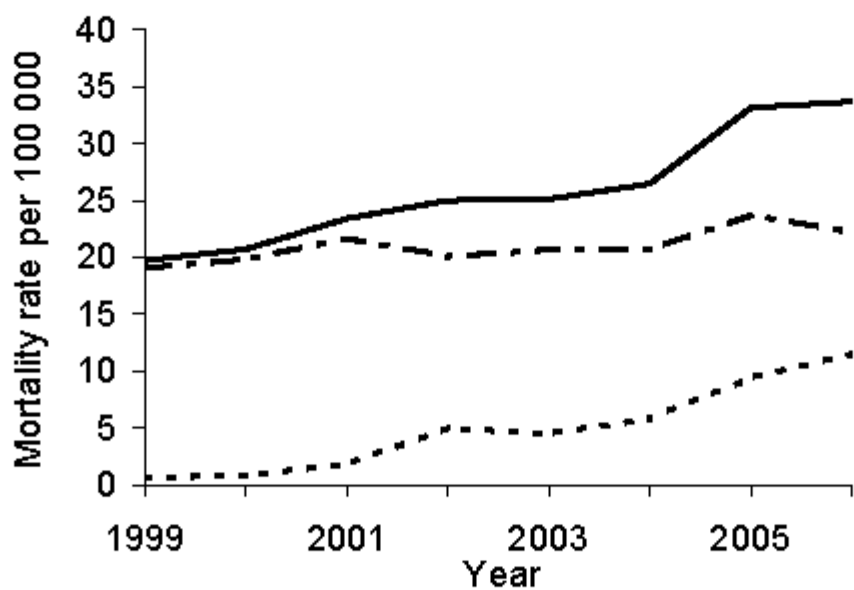

f

Barbecue charcoal suicides Taiwan  
1999-2006 (females)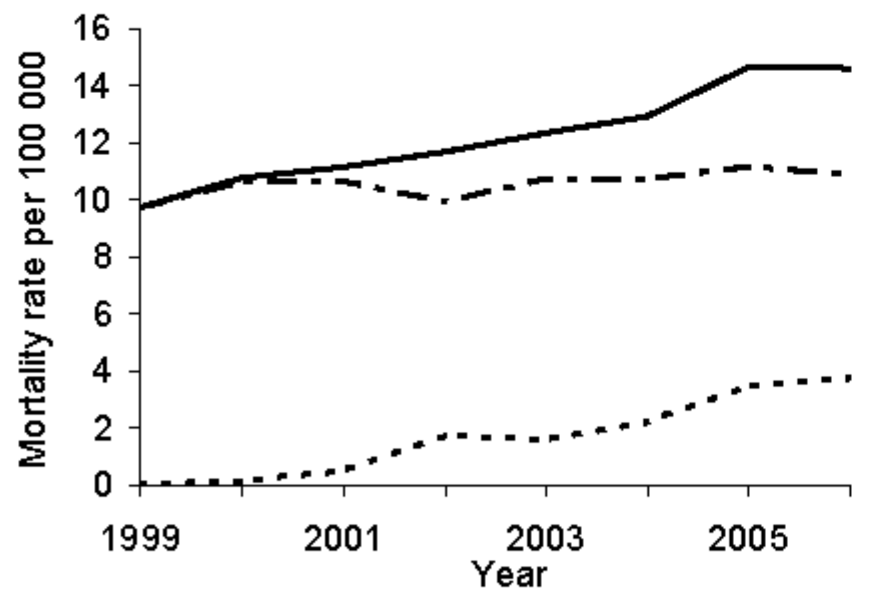

Supplement: MOESM1 [file 9488140]
